# Supplementary material for: Mortality prediction by bispectral electroencephalography among 502 patients: its role in dementia
Source: PubMed Central journal article supplement (PMC8204260; doi:10.1093/braincomms/fcab037), 2021-03-13
Supplement: fcab037_supplementary_data.pdf [file fcab037_supplementary_data.pdf]

## **Supplementary Materials**

**Supplementary Table 1** Demographic characteristic of the replication cohort (N = 228)

**Supplementary Table 2** Result of the Cox proportional hazard model (N = 228)

**Supplementary Table 3** Result of the Cox proportional hazard model (N = 502)

**Supplementary Table 4** Result of the Cox proportional hazard model (N = 502)

**Supplementary Figure 1** Short-term Mortality Based on the Dementia and BSEEG Categories in 502 Subjects (Discovery and Replication Cohorts)

**Supplementary Table 1** Demographic characteristic of the replication cohort (N = 228)

|                     | Delirium     |            | Dementia      |            | Day1 BSEEG    |            |
|---------------------|--------------|------------|---------------|------------|---------------|------------|
|                     | Case         | Control    | Case          | Control    | Positive      | Negative   |
| n                   | 67           | 161        | 36            | 192        | 74            | 154        |
| Female, n (%)       | 29 (43.3)    | 82 (50.9)  | 25 (69.4) *   | 86 (44.8)  | 32 (43.2)     | 79 (51.3)  |
| Age, mean (SD), (y) | 72.7 (9.4)** | 69.9 (9.5) | 73.2 (8.8) ** | 70.2 (9.6) | 71.6 (9.3) ** | 70.3 (9.6) |
| CCI, mean (SD)      | 4.3 (2.7) ** | 2.5 (2.9)  | 4.1 (3.0) **  | 2.8 (2.9)  | 3.4 (3.1) **  | 2.8 (2.8)  |

**Note:** \* p<0.05 vs. Control or Negative, \*\* p<0.01 vs. Control or Negative.

**Abbreviations:** BSEEG, bispectral electroencephalography; CCI, Charlson Comorbidity Index.

**Supplementary Table 2** Result of the Cox proportional hazard model (N = 228)

|                 | Hazard Ratio | 95% Confidence interval | p-value |
|-----------------|--------------|-------------------------|---------|
| BSEEG, Positive | 2.82         | 1.33-6.00               | 0.007   |
| Age             | 1.05         | 1.01-1.10               | 0.012   |
| Sex, Female     | 1.49         | 0.71-3.14               | 0.296   |
| CCI             | 1.19         | 1.08-1.31               | <0.001  |
| Delirium        | 2.14         | 1.01-4.54               | 0.048   |

**Abbreviations:** BSEEG, bispectral electroencephalography; CCI, Charlson Comorbidity Index.

**Supplementary Table 3** Result of the Cox proportional hazard model (N = 502)

|                 | Hazard Ratio | 95% Confidence interval | p-value |
|-----------------|--------------|-------------------------|---------|
| BSEEG, Positive | 2.43         | 1.55-3.82               | <0.001  |
| Age             | 1.04         | 1.01-1.06               | 0.002   |
| Sex, Female     | 1.09         | 0.71-1.66               | 0.709   |
| CCI             | 1.18         | 1.11-1.25               | <0.001  |
| Delirium        | 2.00         | 1.30-3.09               | 0.002   |

**Abbreviations:** BSEEG, bispectral electroencephalography; CCI, Charlson Comorbidity Index.

**Supplementary Table 4** Result of the Cox proportional hazard model (N = 502)

|                 | Hazard Ratio | 95% Confidence interval | p-value |
|-----------------|--------------|-------------------------|---------|
| BSEEG, Positive | 2.43         | 1.55-3.82               | <0.001  |
| Age             | 1.04         | 1.01-1.06               | 0.004   |
| Sex, Female     | 1.07         | 0.70-1.65               | 0.747   |
| CCI             | 1.18         | 1.11-1.25               | <0.001  |
| Delirium        | 1.97         | 1.25-3.09               | 0.003   |
| Dementia        | 1.08         | 0.66-1.76               | 0.760   |

**Abbreviations:** BSEEG, bispectral electroencephalography; CCI, Charlson Comorbidity Index.

### Supplementary Figure 1 Short-term Mortality Based on the Dementia and BSEEG Categories in 502 Subjects (Discovery and Replication Cohorts)

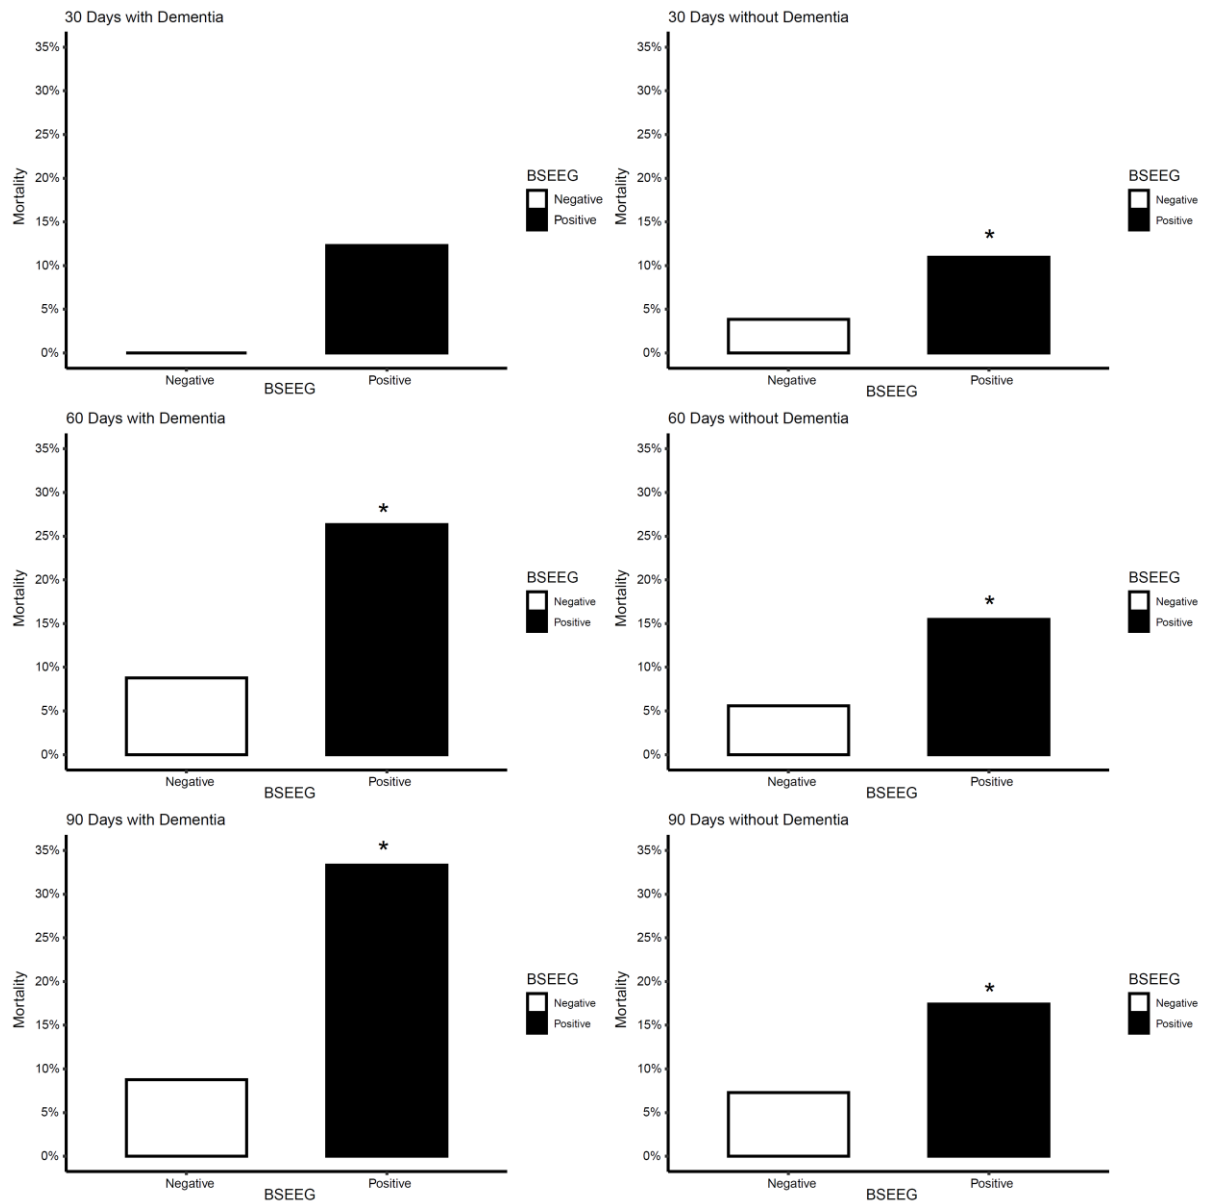

**Notes:** \* Relative risk was significantly higher than those in the BSEEG-negative group.

**Abbreviation:** BSEEG, bispectral electroencephalography
